# Supplementary material for: Pyrenoid functions revealed by proteomics in Chlamydomonas reinhardtii
Source: PubMed Central journal article supplement (PMC5826530; doi:10.1371/journal.pone.0185039), 2018-02-26
Supplement: pone.0185039.s004.pdf [file pone.0185039.s004.pdf]

**A**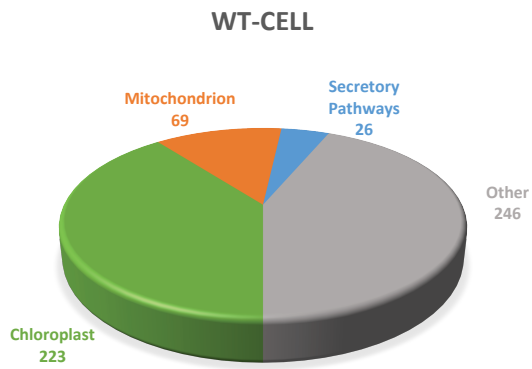**B**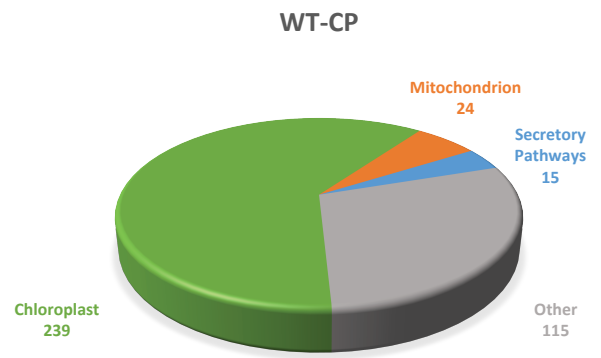**S1 Fig.**

**Distribution of the subcellular localization of proteins identified in P fractions prepared from WT cells (WT-cell) or from WT purified chloroplasts (WT-cp).**
