# Supplementary material for: Pyrenoid functions revealed by proteomics in Chlamydomonas reinhardtii
Source: PubMed Central journal article supplement (PMC5826530; doi:10.1371/journal.pone.0185039), 2018-02-26
Supplement: pone.0185039.s005.pdf [file pone.0185039.s005.pdf]

**A** PYRENOID PROTEOME

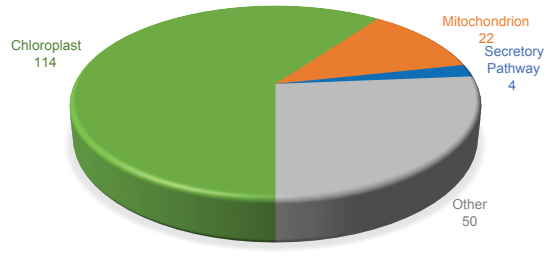

**B** STROMAL PROTEOME

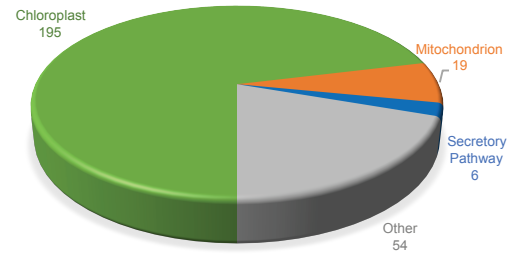

**C** CHLOROPLAST PROTEOME

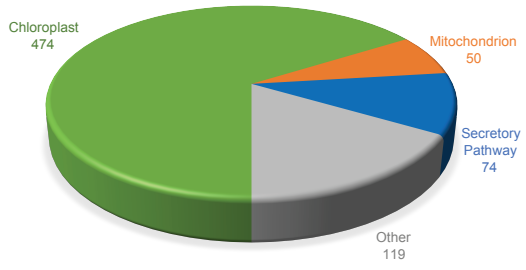

**D** TOTAL PROTEOME

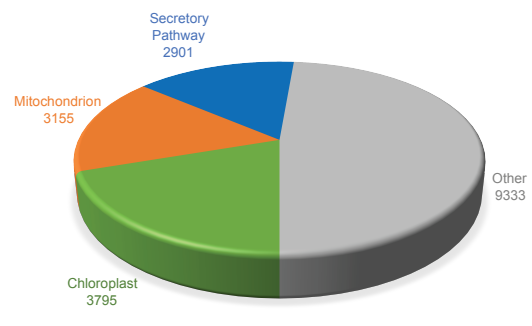

**S2 Fig.**  
Distribution of the subcellular localization of proteins present in diverse proteomes.
