# Supplementary material for: Pyrenoid functions revealed by proteomics in Chlamydomonas reinhardtii
Source: PubMed Central journal article supplement (PMC5826530; doi:10.1371/journal.pone.0185039), 2018-02-26
Supplement: pone.0185039.s006.pdf [file pone.0185039.s006.pdf]

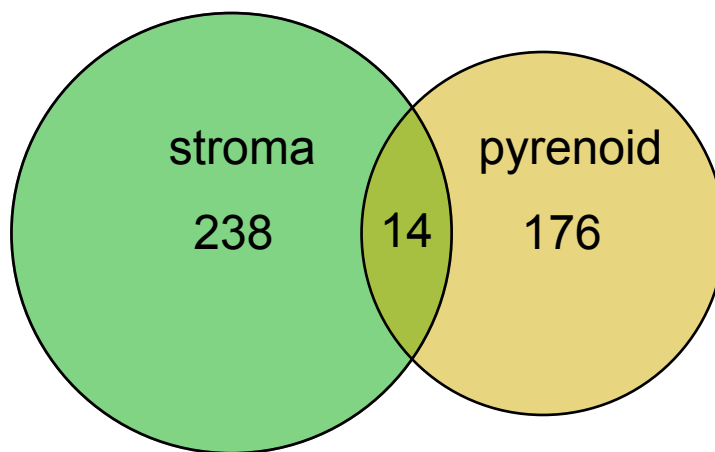

**S3 Fig.**  
**Overlap between the pyrenoid proteome and the stromal proteome**
